# Supplementary material for: A window into lysogeny: revealing temperate phage biology with transcriptomics
Source: PubMed Central journal article supplement (PMC7067206; doi:10.1099/mgen.0.000330), 2020-02-05
Supplement: mgen-6-330-s002.pdf [file mgen-6-330-s002.pdf]

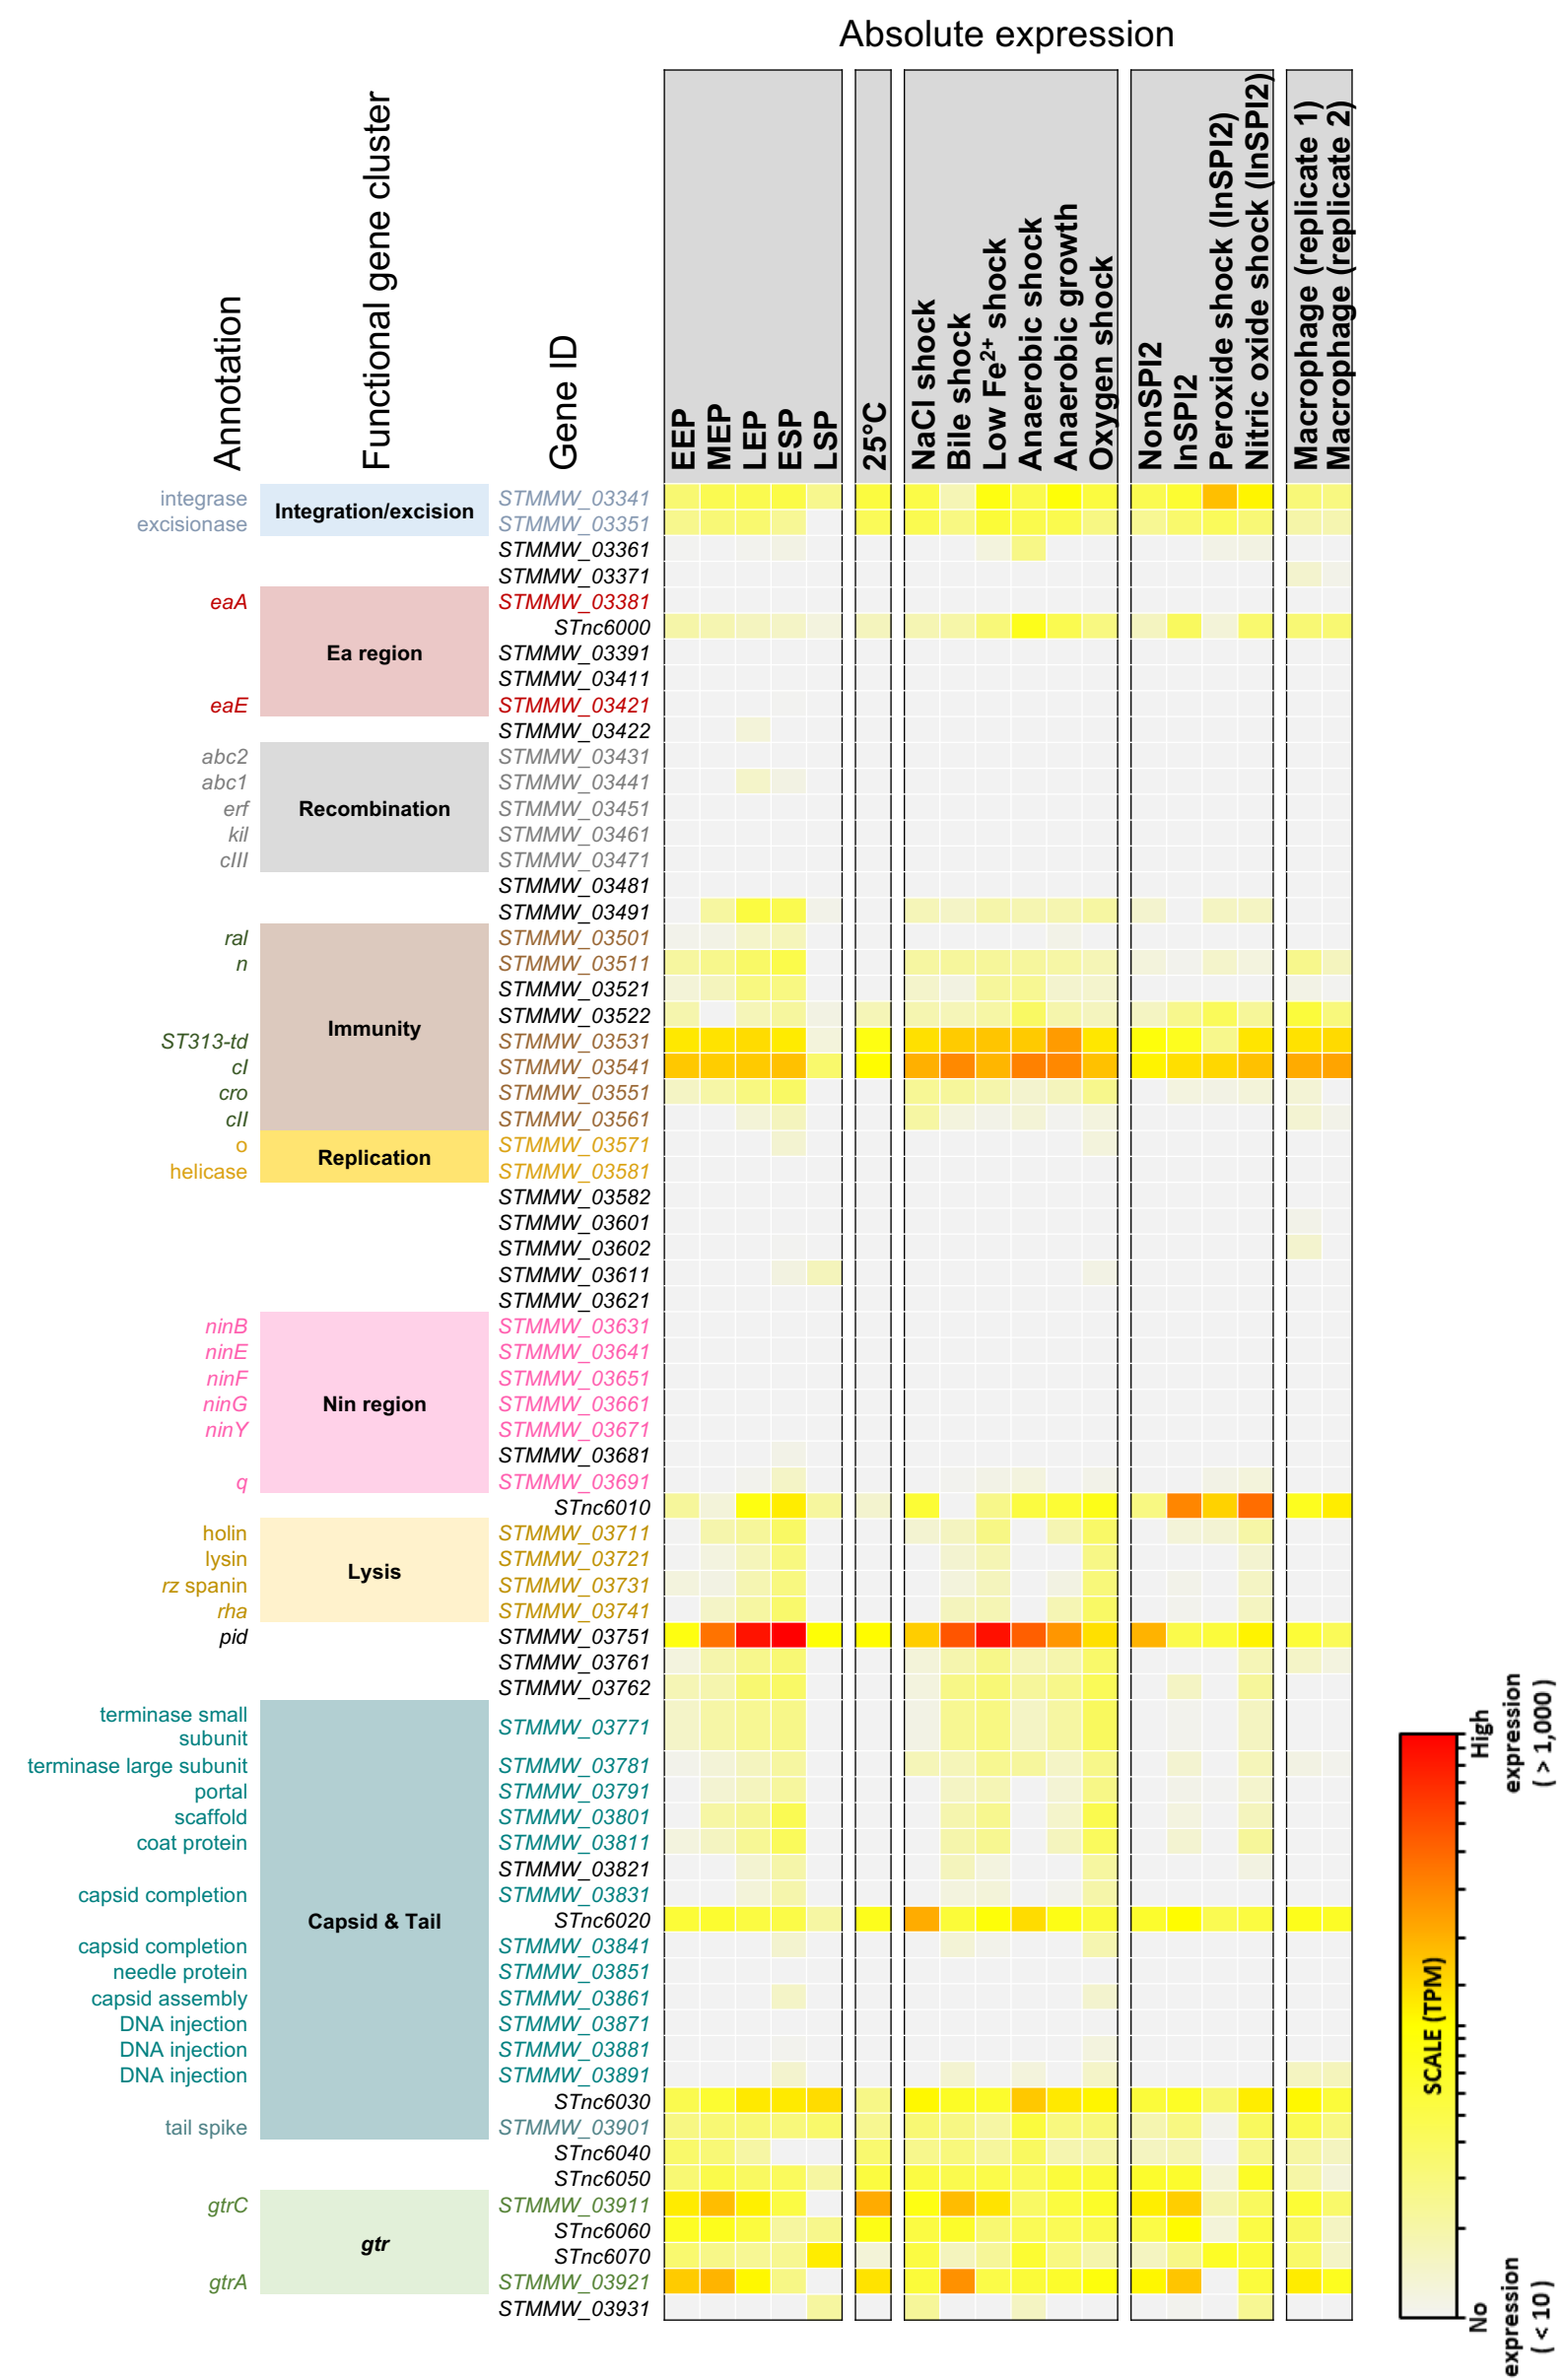

Supplementary Figure 1. Heat map showing the absolute expression of BTP1 genes in 17 infection-relevant conditions. RNA-seq data from Canals et al., 2019 were used to generate absolute expression values (transcript per million, TPM) for each coding gene and annotated ncRNA of the BTP1 prophage.

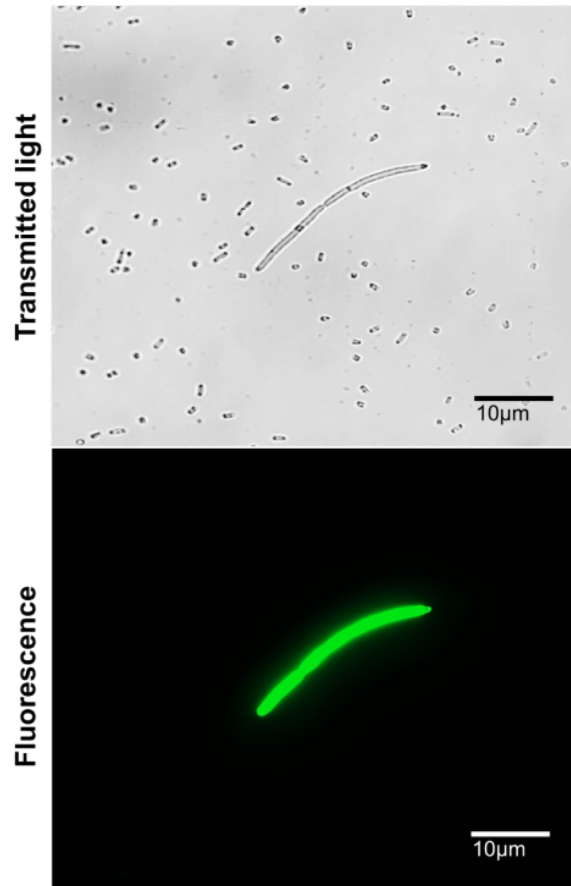

Supplementary Figure 2. GFP reporting of BTP1 prophage induction reveals spontaneous induction occurs in a fraction of the lysogenic population. Example of elongated fluorescent cell morphology found in overnight culture of D23580  $\Delta$ lysis::*gfp*<sup>+</sup>. Both transmitted light and fluorescent light images of the same field using a 100X oil immersion objective are shown.

# Gifsy-2 (BTP2)

4/74

D23580

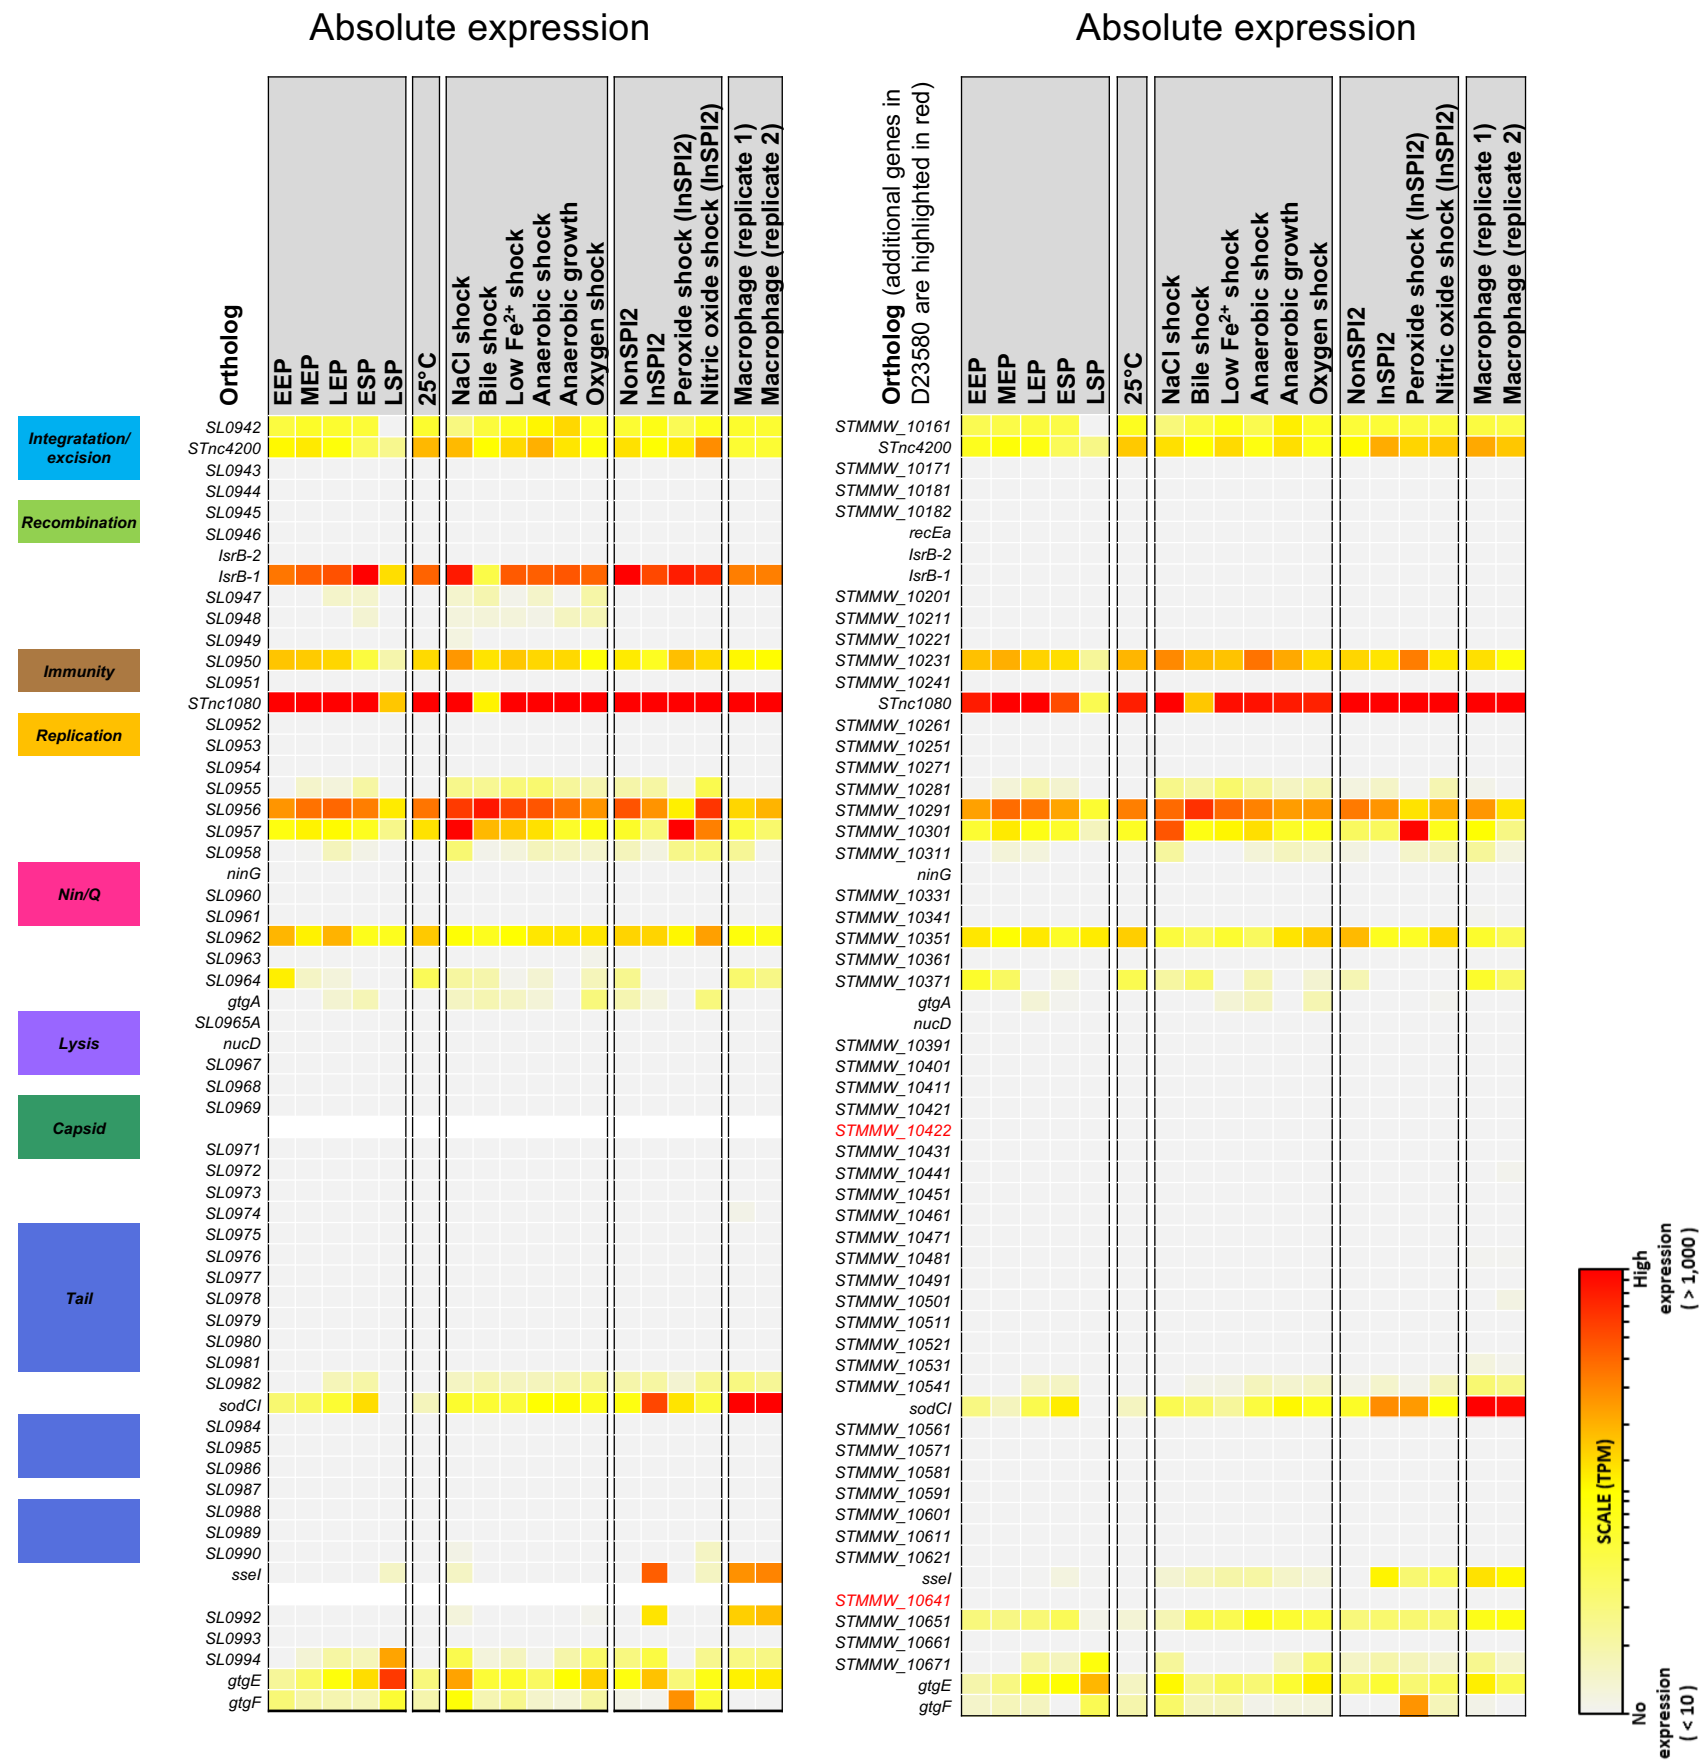

Supplementary Figure 3. Heat map showing the absolute expression of the Gifsy-2 prophage of D23580 and 4/74 strains in 17 infection-relevant conditions. RNA-seq data from Canals et al., 2019 were used to generate absolute expression values (transcript per million, TPM) for each coding gene and annotated ncRNA of the Gifsy-2 prophage. Ortholog IDs in red text indicate genes unique to Gifsy-2<sup>D23580</sup> or Gifsy-2<sup>4/74</sup>.

# ST64B (BTP3)

4/74

D23580

Absolute expression

Absolute expression

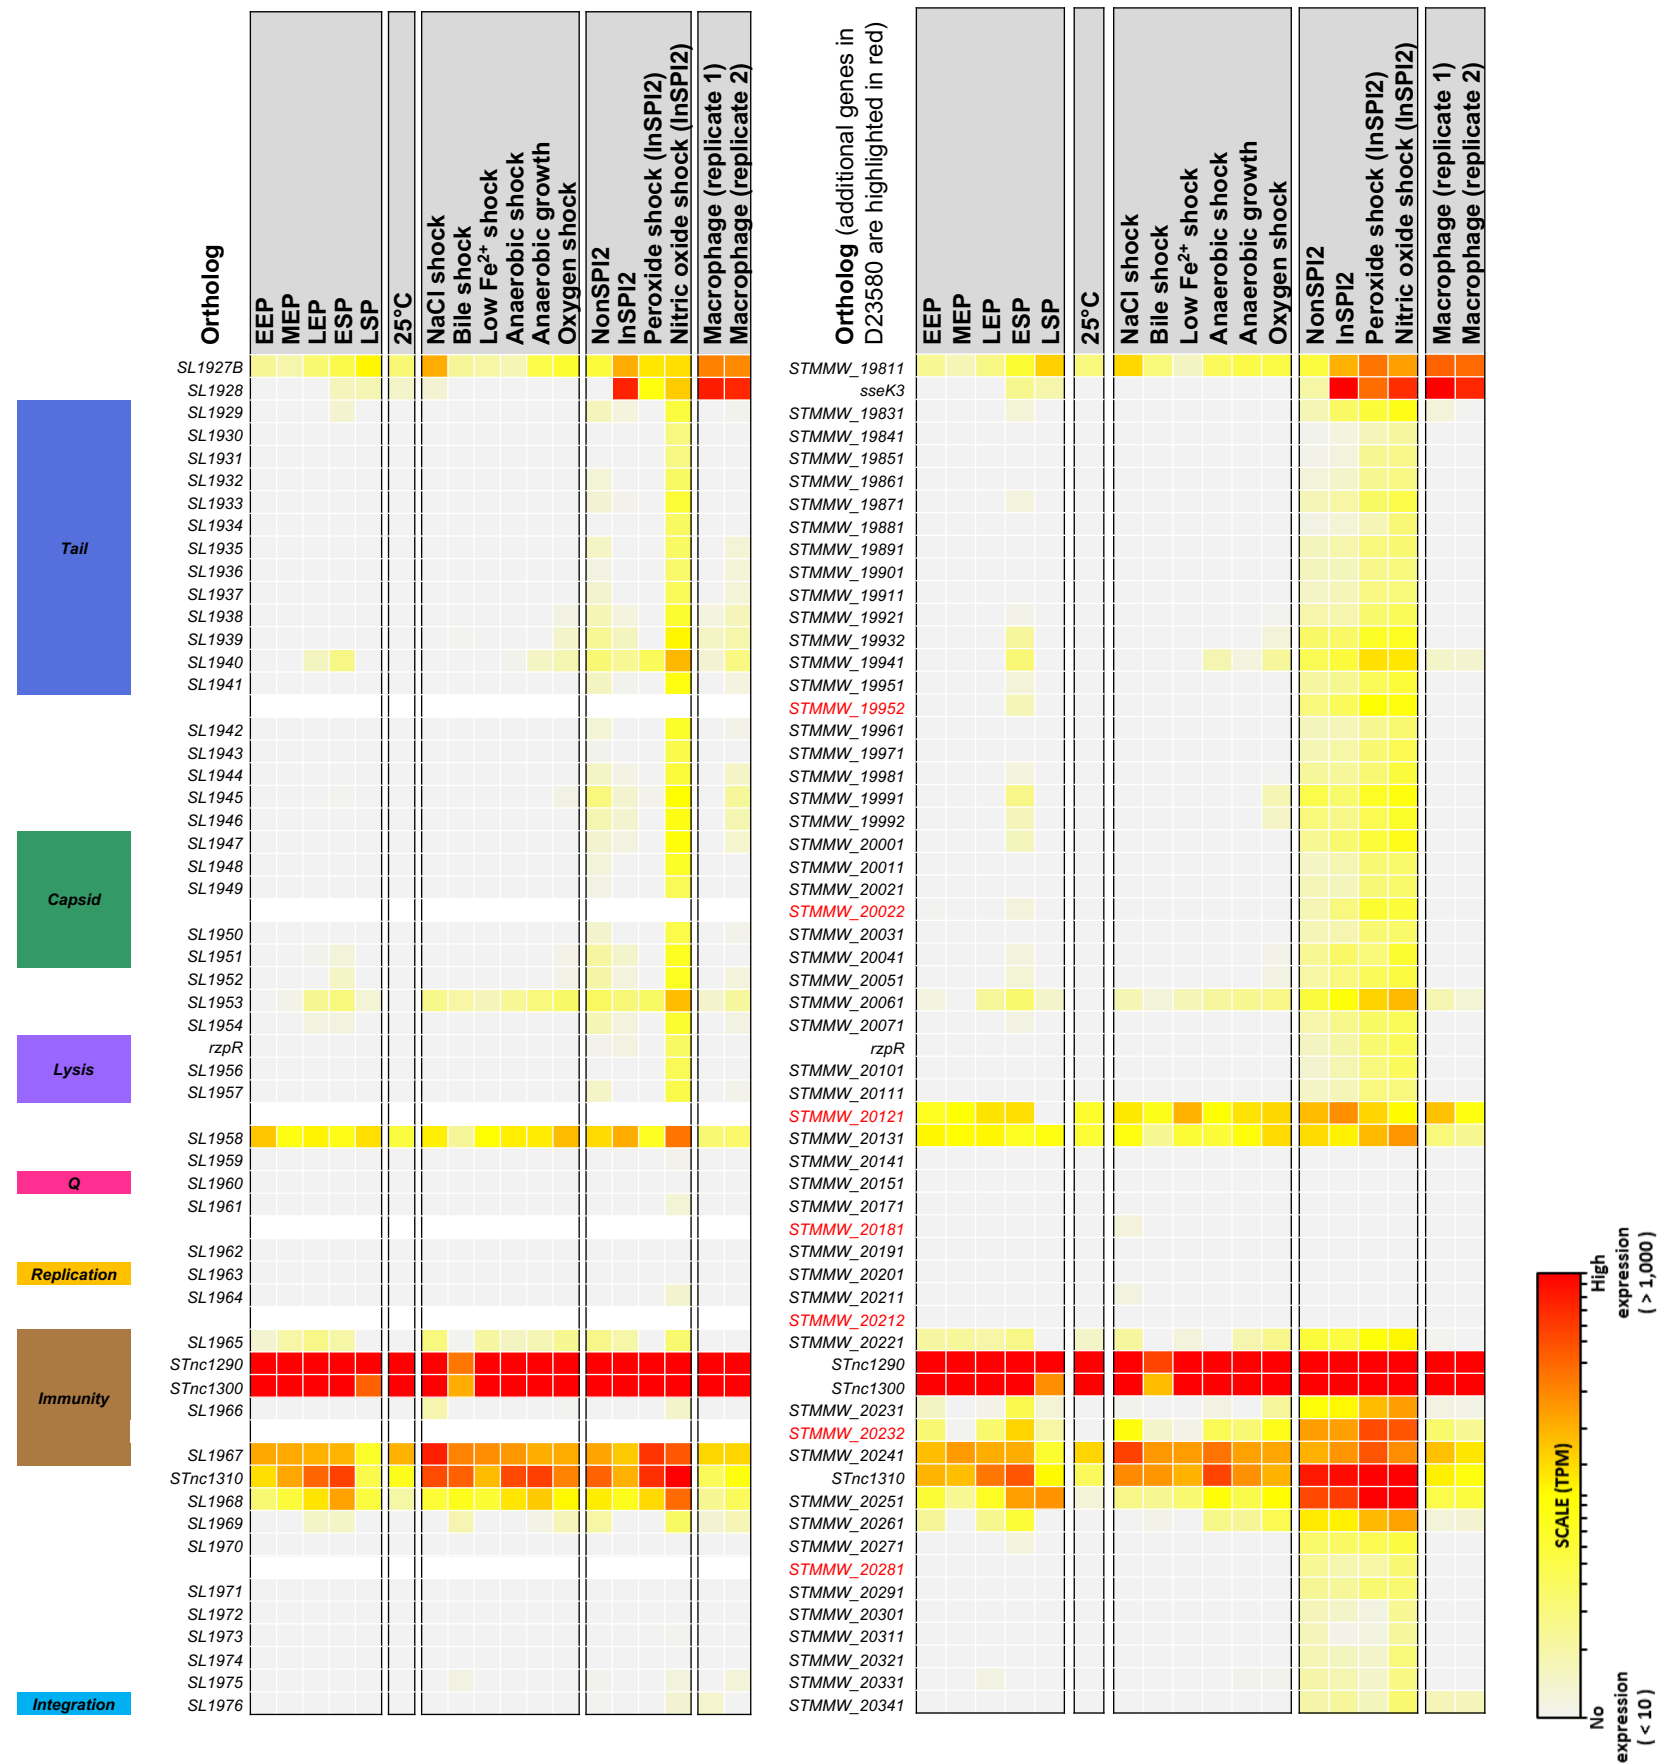

Supplementary Figure 4. Heat map showing the absolute expression of the ST64B prophage of D23580 and 4/74 strains in 17 infection-relevant conditions. RNA-seq data from Canals et al., 2019 were used to generate absolute expression values (transcript per million, TPM) for each coding gene and annotated ncRNA of the ST64B prophage. Ortholog IDs in red text indicate genes unique to ST64B<sup>D23580</sup> or ST64B<sup>4/74</sup>.

# Gifsy-1 (BTP4)

4/74

D23580

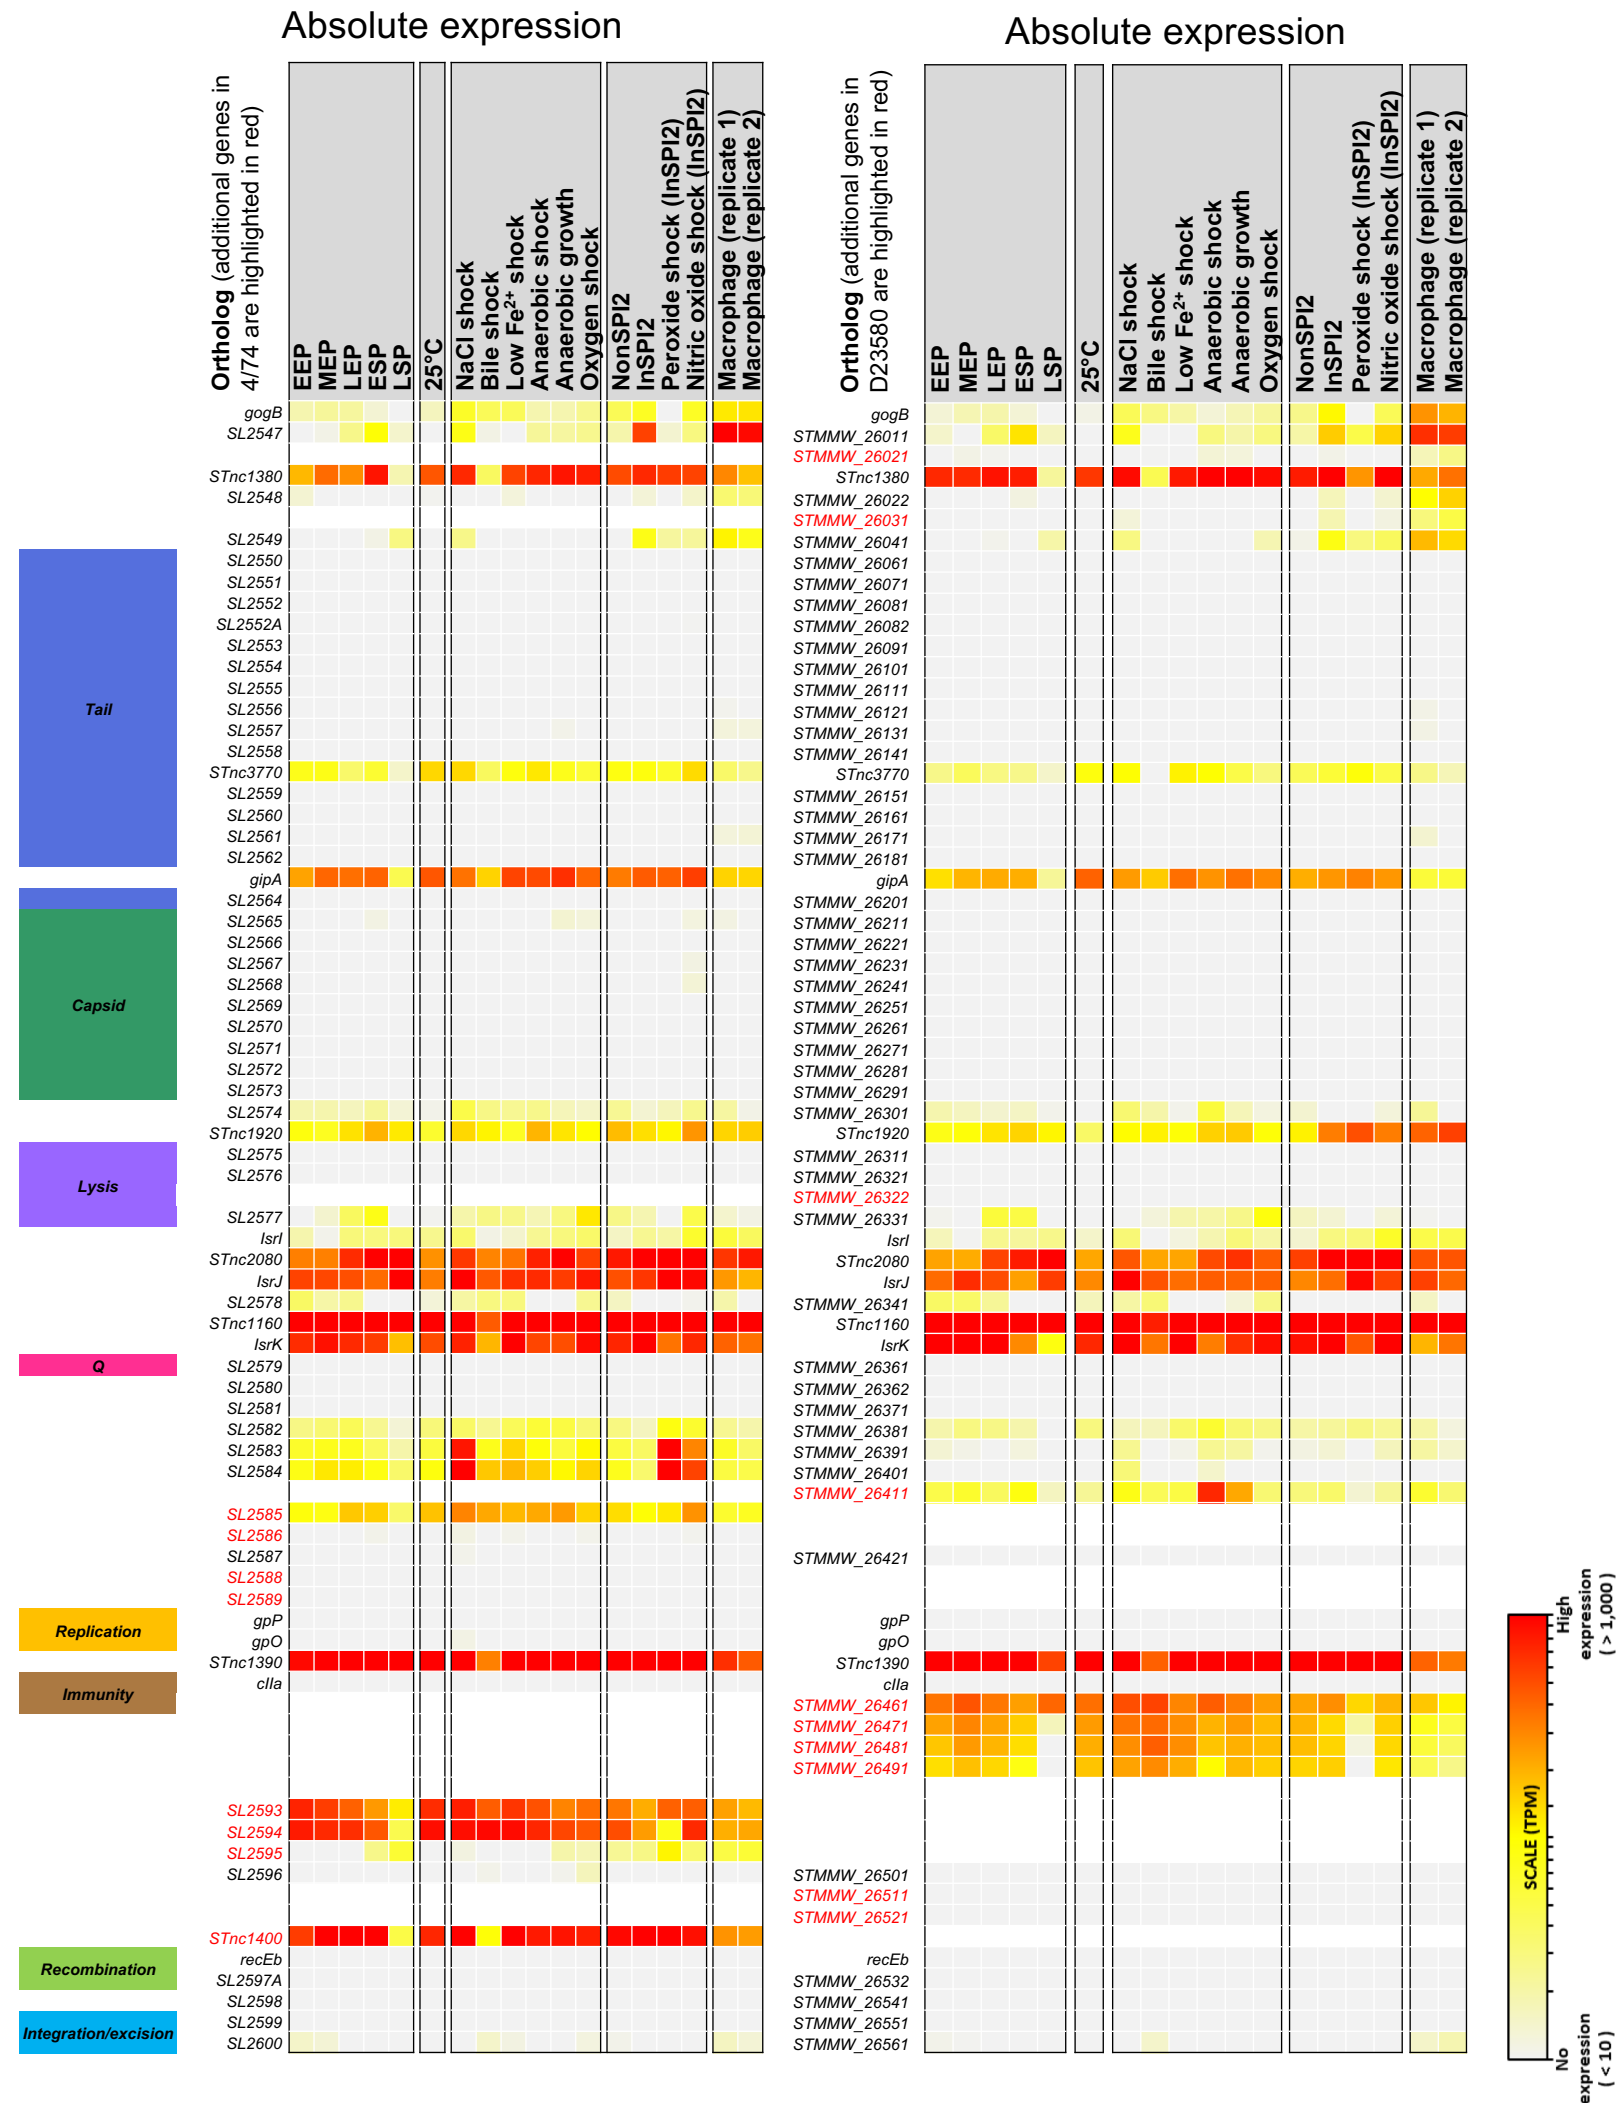

Supplementary Figure 5. Heat map showing the absolute expression of the Gifsy-1 prophage of D23580 and 4/74 strains in 17 infection-relevant conditions. RNA-seq data from Canals et al., 2019 were used to generate absolute expression values (transcript per million, TPM) for each coding gene and annotated ncRNA of the Gifsy-1 prophage. Ortholog IDs in red text indicate genes unique to Gifsy-1<sup>D23580</sup> or Gifsy-1<sup>4/74</sup>.

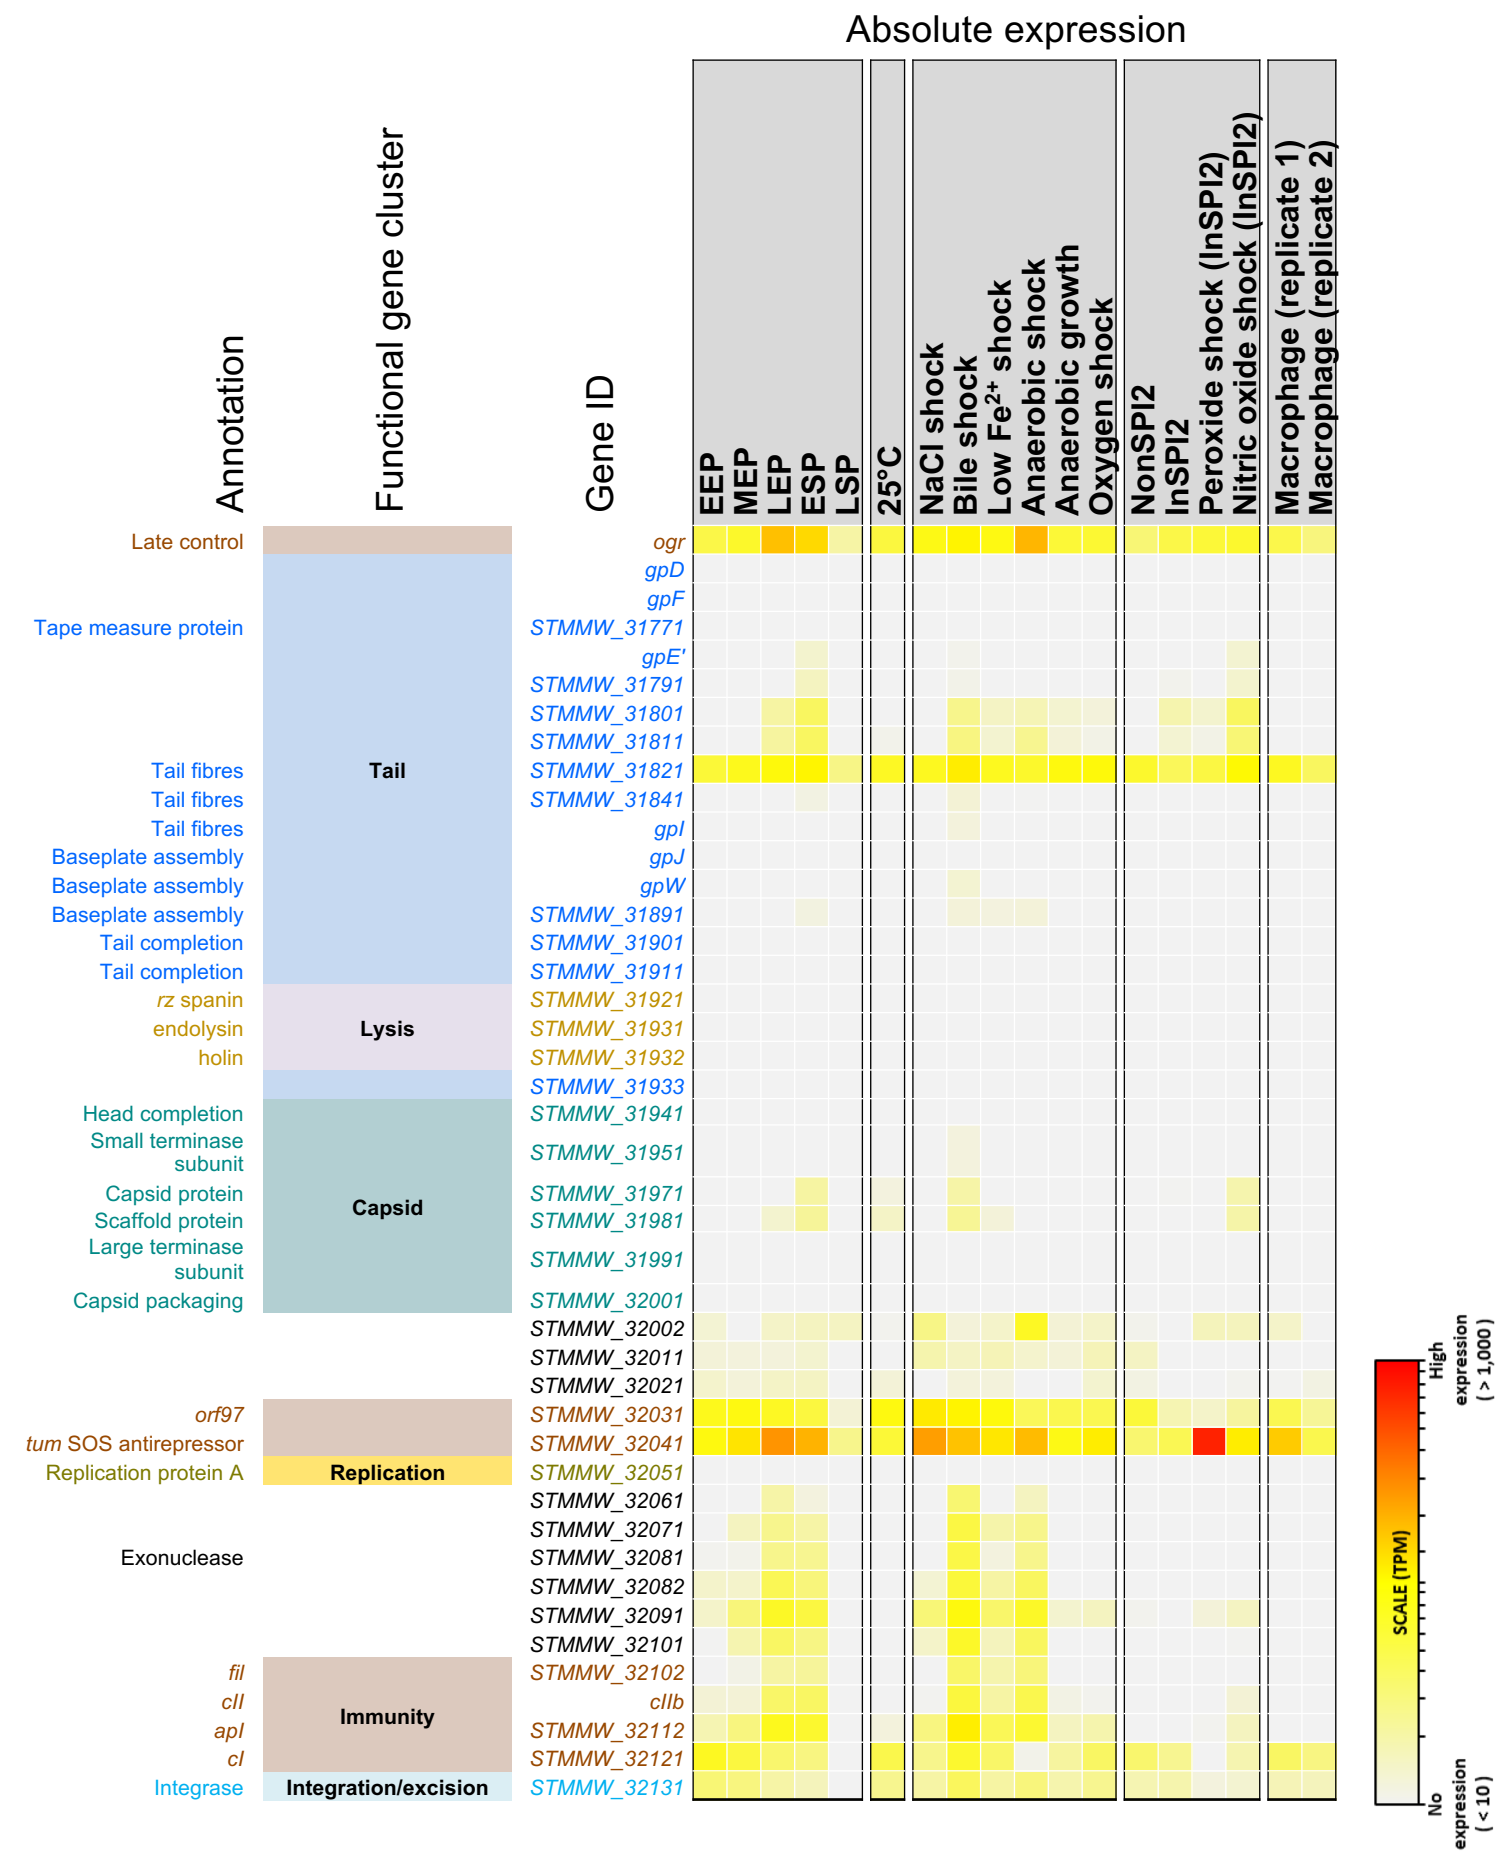

Supplementary Figure 6. Heat map showing the absolute expression of BTP5 genes in 17 infection-relevant conditions. RNA-seq data from Canals et al., 2019 were used to generate absolute expression values (transcript per million, TPM) for each coding gene of the BTP5 prophage.

Supplementary Table 1. Accession numbers of all sequence data used in this study

| Accession number | Data type | Description                            |
|------------------|-----------|----------------------------------------|
| FN424405         | Genome    | D23580 genome                          |
| CP002487         | Genome    | 4/74 genome                            |
| GSM3381722       | RNA-seq   | 4/74 EEP                               |
| GSM3381737       | RNA-seq   | 4/74 MEP                               |
| GSM3381731       | RNA-seq   | 4/74 LEP                               |
| GSM3381726       | RNA-seq   | 4/74 ESP                               |
| GSM3381733       | RNA-seq   | 4/74 LSP                               |
| GSM3381715       | RNA-seq   | 4/74 25°C                              |
| GSM3381738       | RNA-seq   | 4/74 NaCl S                            |
| GSM3381721       | RNA-seq   | 4/74 Bile S                            |
| GSM3381732       | RNA-seq   | 4/74 LwFe S                            |
| GSM3381720       | RNA-seq   | 4/74 No O <sub>2</sub> S               |
| GSM3381743       | RNA-seq   | 4/74 No O <sub>2</sub>                 |
| GSM3381744       | RNA-seq   | 4/74 O <sub>2</sub> S                  |
| GSM3381742       | RNA-seq   | 4/74 noSPI2                            |
| GSM3381730       | RNA-seq   | 4/74 inSPI2                            |
| GSM3381745       | RNA-seq   | 4/74 H <sub>2</sub> O <sub>2</sub> S   |
| GSM3381743       | RNA-seq   | 4/74 NOs                               |
| GSM3381734       | RNA-seq   | 4/74 MAC-1                             |
| GSM3381735       | RNA-seq   | 4/74 MAC -2                            |
| GSM3381689       | RNA-seq   | D23580 EEP                             |
| GSM3381704       | RNA-seq   | D23580 MEP                             |
| GSM3381698       | RNA-seq   | D23580 LEP                             |
| GSM3381693       | RNA-seq   | D23580 ESP                             |
| GSM3381700       | RNA-seq   | D23580 LSP                             |
| GSM3381682       | RNA-seq   | D23580 25°C                            |
| GSM3381705       | RNA-seq   | D23580 NaCl S                          |
| GSM3381688       | RNA-seq   | D23580 Bile S                          |
| GSM3381699       | RNA-seq   | D23580 LwFe S                          |
| GSM3381687       | RNA-seq   | D23580 No O <sub>2</sub> S             |
| GSM3381686       | RNA-seq   | D23580 No O <sub>2</sub>               |
| GSM3381711       | RNA-seq   | D23580 O <sub>2</sub> S                |
| GSM3381709       | RNA-seq   | D23580 noSPI2                          |
| GSM3381697       | RNA-seq   | D23580 inSPI2                          |
| GSM3381714       | RNA-seq   | D23580 H <sub>2</sub> O <sub>2</sub> S |
| GSM3381710       | RNA-seq   | D23580 NOs                             |
| GSM3381701       | RNA-seq   | D23580 MAC-1                           |
| GSM3381702       | RNA-seq   | D23580 MAC-2                           |
| GSM2889540       | dRNA-seq  | D23580 ESP TEX                         |
| GSM2889541       | dRNA-seq  | D23580 inSPI2 TEX                      |
| GSM2889542       | dRNA-seq  | D23580 pool TEX                        |
| GSM4204389       | dRNA-seq  | D23580 MAC-1 TEX                       |
| GSM4204390       | dRNA-seq  | D23580 MAC-2 TEX                       |

Supplementary Table 2. Description of RNA-seq experiment growth conditions as described in Kröger et al., 2013 and Canals et al., 2019.

| <b>RNA-seq experiment</b>    | <b>Abbreviation</b> | <b>Growth conditions</b>                                                                                                                                                                    |
|------------------------------|---------------------|---------------------------------------------------------------------------------------------------------------------------------------------------------------------------------------------|
| Early exponential phase      | EEP                 | Growth in Lennox broth to OD <sub>600</sub> 0.1                                                                                                                                             |
| Mid exponential phase        | MEP                 | Growth in Lennox broth to OD <sub>600</sub> 0.3                                                                                                                                             |
| Late exponential phase       | LEP                 | Growth in Lennox broth to OD <sub>600</sub> 1.0                                                                                                                                             |
| Early stationary phase       | ESP                 | Growth in Lennox broth to OD <sub>600</sub> 2.0                                                                                                                                             |
| Late stationary phase        | LSP                 | Growth in Lennox broth to OD <sub>600</sub> 2.0 + 6 h                                                                                                                                       |
| Low temperature              | 25°C                | Growth in Lennox broth to OD <sub>600</sub> 0.3 at 25°C (It's growth at low temperature (ON culture 37°C, 200 RPM, Lennox, diluted 1:1000 and grown at 25 °C until OD <sub>600</sub> = 0.3) |
| Osmotic shock                | NaCl_S              | Growth in Lennox broth to OD <sub>600</sub> 0.3; then addition of NaCl to a final concentration of 0.3 M for 10 min                                                                         |
| Addition of bile             | Bile_S              | Growth in Lennox broth to OD <sub>600</sub> 0.3; then addition of bile to a final concentration of 3% for 10 min                                                                            |
| Iron limitation              | LwFe_S              | Growth in Lennox broth to OD <sub>600</sub> 0.3; then addition of 2,2'-dipyridyl to a final concentration of 0.2 mM for 10 min                                                              |
| Anaerobic shock              | No_O2_S             | Growth in Lennox broth to OD <sub>600</sub> 0.3 (50 ml), then filled into 50 ml closed centrifuge tube and incubated without agitation for 30 min at 37°C (Falcon tube)                     |
| Anaerobic growth             | No_O2               | Static growth in Lennox broth to OD <sub>600</sub> 0.3 in a completely filled and closed 50 ml centrifuge tube (Falcon tube)                                                                |
| Aerobic shock                | O2_S                | Static growth in Lennox broth to OD <sub>600</sub> 0.3 in a completely filled and closed 50 ml centrifuge tube (Falcon tube); then 15 min aerobic growth (baffled flask, 250 rpm)           |
| SPI2 non-inducing conditions | noSPI2              | Growth in PCN medium to OD <sub>600</sub> 0.3 (pH 7.4, 25 mM Pi)                                                                                                                            |
| SPI2 inducing conditions     | inSPI2              | Growth in PCN medium to OD <sub>600</sub> 0.3 (pH 5.8, 0.4 mM Pi)                                                                                                                           |
| Oxidative stress             | H2O2_S              | PCN to OD <sub>600</sub> 0.3, then addition of H <sub>2</sub> O <sub>2</sub> to final concentration of 1 mM H <sub>2</sub> O <sub>2</sub> for 12 min                                        |
| Nitric oxide                 | NOs                 | Growth in PCN medium to OD <sub>600</sub> 0.3 (pH 5.8, 0.4 mM Pi); then addition of 250 µM Spermine NONOate for 20 min                                                                      |
| RNA from macrophages         | MAC                 | RNA isolated from RAW 264.7 murine macrophages 8 h post infection                                                                                                                           |



Supplementary Table 3. All oligonucleotide sequences used in this study

| Oligo Name              | Sequence (5'→3')                                                  | Purpose                                                                                                                                               |
|-------------------------|-------------------------------------------------------------------|-------------------------------------------------------------------------------------------------------------------------------------------------------|
| NW_88                   | CTAAATACATTCAAATATGTATCCGGTCCAACCAGCGGCACCAG                      | Replacement of <i>bla</i> (ap <sup>R</sup> ) by <i>aacC1</i> (Gm <sup>R</sup> ) in pPL                                                                |
| NW_89                   | GTAAACTTGGTCTGACAGTTACCAATTAGGTGGCGGTACTTGGG                      | Replacement of <i>bla</i> (ap <sup>R</sup> ) by <i>aacC1</i> (Gm <sup>R</sup> ) in pPL                                                                |
| STnc6030_pPL_F (NW_295) | GTGAGCGGATAACAAGATACTGAGCACAGCAATATAGTCAACCTGAGAAC                | For insertion of STnc6030 asRNA into expression plasmid pPL-Gm using overlap extension PCR cloning                                                    |
| STnc6030_pPL_R (NW_296) | GCCTTTCGTTTTATTTGATGCCTCTAGACTGCGTATCTGAAGGGGATTAAG               |                                                                                                                                                       |
| STnc6030_T7 (NW_297)    | TAATACGACTCACTATAGGGCTGCGTATCTGAAGGGGATTAAG                       | For synthesis of anti-STnc6030 riboprobe. Use with STnc60_pPLGM_f                                                                                     |
| STnc6030_pPL_R NW_296   | GCCTTTCGTTTTATTTGATGCCTCTAGACTGCGTATCTGAAGGGGATTAAG               | Amplification of STnc6030 region from BTP1 prophage                                                                                                   |
| NW_298                  | TAATACGACTCACTATAGGGCATAGTCAGGAAGAAGTGAT                          |                                                                                                                                                       |
| STnc6030_pPL_F NW_295   | GTGAGCGGATAACAAGATACTGAGCACAGCAATATAGTCAACCTGAGAAC                | Used with NW_296 for nested amplification of STnc6030 region from amplification product of NW_298 and NW_295                                          |
| Late_gfp_2_L_f          | TTCCTAATTCAATAGAGCAAATCCCCTCAATAAAGGGGGTAGAGCGTTCTAGATTTAAGAAGGAG |                                                                                                                                                       |
| gfp_kan_2_L_r           | CTAAGGAGGATATTCATATGGCGACCGGCGCTCAGCTGGA                          | Amplification of <i>gfp+</i> gene from pZEP08 with flanking ends for replacement of BTP1 lysis genes with <i>gfp-KmR</i> by Lambda Red recombineering |
| Gfp_kan_2_R_f           | TCCAGCTGAGCGCCGGTCGCCATATGAATATCCTCCTTAG                          | Amplification of <i>frt-aph-frt</i> from pKD4 with flanking ends for replacement of BTP1 lysis genes with <i>gfp-KmR</i> by Lambda Red recombineering |
| Late_gfp_2_R_r          | TAAGATAAATTTACATGGGTGCTTGTCACCCATGTTTTACAATATGTGTAGGCTGGAGCTGCTTC |                                                                                                                                                       |
| Late_gfp_ext_f          | AACACAGTATCCTGGATTTGTTCTA                                         | Amplification of region external to lysis genes to confirm insertion of the <i>gfp-KmR</i> cassette                                                   |
| Late_gfp_ext_r          | TGCTTAACAAGGGTAGGTGATGGCC                                         |                                                                                                                                                       |

Supplementary Table 4. All bacterial strains, phages and plasmids used in this study

| Type             | Name                      | Description                                                                                               | Reference / origin / accession (if available) |
|------------------|---------------------------|-----------------------------------------------------------------------------------------------------------|-----------------------------------------------|
| Bacterial strain | JH3621                    | <i>S. Typhimurium</i> D23580 WT                                                                           | (Kingsley et al., 2009) / FN424405            |
| Bacterial strain | JH3810                    | <i>S. Typhimurium</i> D23580 $\Delta$ BTP1                                                                | (Owen et al., 2017)                           |
| Bacterial strain | JH3676                    | <i>S. Typhimurium</i> 4/74 WT                                                                             | (Rankin and Taylor, 1966) / CP002487          |
| Bacterial strain | <i>E. coli</i> TOP10      | Highly competent <i>E. coli</i> strain for cloning procedures                                             | Invitrogen                                    |
| Phage            | BTP1 WT                   |                                                                                                           | Isolated from D23580 supernatant / LT714109.2 |
|                  | P22 WT                    |                                                                                                           | Gift from A. Aertsen / BK000582               |
| Plasmid          | pP <sub>L</sub> (pJV300)  | Expression plasmid, Ap <sup>R</sup>                                                                       | (Sittka et al., 2007)                         |
| Plasmid          | pME4510                   | Promoter search vector pME4510, Gm <sup>R</sup>                                                           | (Rist et al., 1998)                           |
| Plasmid          | pP <sub>L</sub> -STnc6030 | Expression plasmid; STnc6030 sRNA under the control of the P <sub>LlacO-1</sub> promoter; Gm <sup>R</sup> | This study                                    |
| Plasmid          | pP <sub>L</sub> -Gm       | Derived from pJV-300 but <i>bla</i> gene replaced with <i>aacC1</i> gene from pME4510; Gm <sup>R</sup>    | This study                                    |
| Plasmid          | pZEP08                    | Used as template to amplify the <i>gfp+</i> for construction of a prophage induction reporter construct   | (Hautefort et al., 2003)                      |
| Plasmid          | pKD4                      | <i>aph-cassette</i> template plasmid ; Km <sup>R</sup>                                                    | (Datsenko and Wanner, 2000)                   |
| Plasmid          | pSIM-5-tet                | Lambda Red recombineering plasmid                                                                         | (Koskiniemi et al., 2011)                     |
